# Supplementary material
Source: MDPI journal article supplement (https://www.mdpi.com/2079-6374/13/5/567)
Supplement: s1 [file s1]

Archive with 1 entries (1 files):
- biosensors-2372521-supplementary.pdf
