# Supplementary material for: Fe3O4@Au Core–Shell Magnetic Nanoparticles for the Rapid Analysis of E. coli O157:H7 in an Electrochemical Immunoassay
Source: MDPI journal article supplement (doi:10.3390/bios13050567), 2023-05-22
Supplement: s1 [file s1 › biosensors-2372521-supplementary.pdf]

## Supplementary Material

# Fe<sub>3</sub>O<sub>4</sub>@Au Core–Shell Magnetic Nanoparticles for the Rapid Analysis of *E. coli* O157:H7 in an Electrochemical Immunoassay

Shayesteh Bazsefidpar<sup>1</sup>, Maria Freitas<sup>2</sup>, Clara R. Pereira<sup>3</sup>, Gemma Gutierrez<sup>4</sup>, Esther Serrano-Pertierra<sup>1</sup>, Henri P. A. Nouws<sup>2</sup>, María Matos<sup>4</sup>, Cristina Delerue-Matos<sup>2</sup>, and María Carmen Blanco-López<sup>1\*</sup>

1. Department of Physical and Analytical Chemistry & Institute of Biotechnology of Asturias, University of Oviedo, c/Julián Clavería 8, 33006 Oviedo, Spain
  2. REQUIMTE/LAQV, Instituto Superior de Engenharia do Porto, Instituto Politécnico do Porto, Rua Dr. António Bernardino de Almeida 431, 4249-015 Porto, Portugal
  3. REQUIMTE/LAQV, Departamento de Química e Bioquímica, Faculdade de Ciências, Universidade do Porto, 4169-007 Porto, Portugal
  4. Department of Chemical and Environmental Engineering & Institute of Biotechnology of Asturias, University of Oviedo, Spain
- \* Correspondence: cblanco@uniovi.es

## Nanomaterials synthesis and functionalization details

The Fe<sub>3</sub>O<sub>4</sub> MNPs were synthesized by the thermal decomposition method according to the procedure reported in reference [1]. Briefly, NMP (35 mL), oleic acid (0.3 M), 1-hexadecanol (0.3 M), and oleylamine (0.3 M) were mixed and heated to 200 °C (under stirring and inert atmosphere). Then, [Fe(acac)<sub>3</sub>] (0.15 M, 10 mL) was quickly added to the previously heated solution, and the stirring was continued for 1 h. Afterward, the reaction mixture was cooled and kept under stirring overnight. The resulting nanoparticles were precipitated by adding ethanol (50 mL), and the material was washed several times with ethanol (to remove the excess of oleylamine and oleic acid) and redispersed in anhydrous toluene (5 mL).

The Fe<sub>3</sub>O<sub>4</sub>@Au core–shell NPs were prepared using a Fe<sub>3</sub>O<sub>4</sub>:HAuCl<sub>3</sub> molar ratio of 1:7. Briefly, the Fe<sub>3</sub>O<sub>4</sub> dispersion (1.25 mL) was diluted with anhydrous toluene (20 mL), and heated to 100 °C, under an inert atmosphere. Subsequently, a solution containing HAuCl<sub>4</sub>·3H<sub>2</sub>O, oleylamine (7.07 mL), and anhydrous toluene (35 mL) was added (drop-wise under vigorous stirring) to the pre-heated dispersion. The reaction mixture was stirred for 1 h. Then, the system was cooled to room temperature, and absolute ethanol (50 mL) was added. The coated nanoparticles were magnetically separated and washed several times with ethanol. The final nanomaterial was redispersed in anhydrous toluene (10 mL) and a dark red-purple dispersion was obtained.

The Fe<sub>3</sub>O<sub>4</sub>@Au concentration was determined as the amount of nanoparticles per mL (mg/mL). The functionalization of the core–shell MNPs (4 mg/mL) was performed with a solution containing 6-mercapto-1-hexanol (MCH) 0.1 M and thioctic acid (TOA) 0.1 M in ethanol. The ethanolic thiol mixture with a volume ratio of 3:1 was added to the Fe<sub>3</sub>O<sub>4</sub>@Au dispersion and kept under stirring overnight. Then, the supernatant was removed by an external magnet, and the NPs were dispersed in a buffer solution (B1).

## References

1. Freitas, M.; Sá Couto, M.; Barroso, M.F.; Pereira, C.; De-Los-Santos-Álvarez, N.; Miranda-Ordieres, A.J.; Lobo-Castañón, M.J.; Delerue-Matos, C. Highly Monodisperse Fe<sub>3</sub>O<sub>4</sub>@Au Superparamagnetic Nanoparticles as Reproducible Platform for Genosensing Genetically Modified Organisms. *ACS Sens* **2016**, *1*, 1044–1053, doi:10.1021/acssensors.6b00182.
